# Supplementary material
Source: MDPI journal article supplement (https://www.mdpi.com/2073-4441/14/3/384)
Supplement: s1 [file s1]

**Table S1.** Trend detection for the flood variables through Mann-Kendall test in different time periods.

| Time period | Flood peak |         | 3-day AMAX flow |         |
|-------------|------------|---------|-----------------|---------|
|             | statistic  | p-value | statistic       | p-value |
| 1883 - 1922 | 0.83       | 0.41    | 0.44            | 0.66    |
| 1884 - 1923 | 1.08       | 0.28    | 0.54            | 0.59    |
| 1885 - 1924 | 1.06       | 0.29    | 0.44            | 0.66    |
| 1886 - 1925 | 1.27       | 0.20    | 0.79            | 0.43    |
| 1887 - 1926 | 1.43       | 0.15    | 0.93            | 0.35    |
| 1888 - 1927 | 1.74       | 0.08    | 1.24            | 0.22    |
| 1889 - 1928 | 1.88       | 0.06    | 1.26            | 0.21    |
| 1890 - 1929 | 1.57       | 0.12    | 1.37            | 0.17    |
| 1891 - 1930 | 1.71       | 0.09    | 0.93            | 0.35    |
| 1892 - 1931 | 1.01       | 0.31    | 0.68            | 0.50    |
| 1893 - 1932 | 1.08       | 0.28    | 0.31            | 0.75    |
| 1894 - 1933 | 1.41       | 0.16    | 0.90            | 0.37    |
| 1895 - 1934 | 0.55       | 0.58    | 0.97            | 0.33    |
| 1896 - 1935 | 0.73       | 0.46    | 0.99            | 0.32    |
| 1897 - 1936 | 0.69       | 0.49    | 0.99            | 0.32    |
| 1898 - 1937 | 1.06       | 0.29    | 1.32            | 0.19    |
| 1899 - 1938 | 0.50       | 0.62    | 0.57            | 0.57    |
| 1900 - 1939 | 0.57       | 0.57    | 0.50            | 0.62    |
| 1901 - 1940 | 1.22       | 0.22    | 1.11            | 0.27    |
| 1902 - 1941 | 1.04       | 0.30    | 0.66            | 0.51    |
| 1903 - 1942 | 0.57       | 0.57    | 0.06            | 0.95    |
| 1904 - 1943 | 1.08       | 0.28    | 0.52            | 0.60    |
| 1905 - 1944 | 1.01       | 0.31    | 0.57            | 0.57    |
| 1906 - 1945 | 0.64       | 0.52    | 0.01            | 0.99    |
| 1907 - 1946 | 0.36       | 0.72    | -0.08           | 0.93    |
| 1908 - 1947 | 0.45       | 0.65    | 0.52            | 0.60    |
| 1909 - 1948 | 0.29       | 0.77    | 0.08            | 0.93    |
| 1910 - 1949 | -0.08      | 0.93    | -0.31           | 0.75    |
| 1911 - 1950 | -0.41      | 0.68    | -0.15           | 0.88    |
| 1912 - 1951 | 0.03       | 0.97    | -0.27           | 0.79    |
| 1913 - 1952 | 0.29       | 0.77    | -0.34           | 0.74    |
| 1914 - 1953 | -0.01      | 0.99    | -0.92           | 0.36    |
| 1915 - 1954 | -0.59      | 0.55    | -0.73           | 0.46    |
| 1916 - 1955 | 0.10       | 0.92    | -0.27           | 0.79    |
| 1917 - 1956 | 0.22       | 0.82    | -0.22           | 0.82    |
| 1918 - 1957 | 0.24       | 0.81    | -0.52           | 0.60    |
| 1919 - 1958 | 0.36       | 0.72    | -0.48           | 0.63    |
| 1920 - 1959 | 0.59       | 0.55    | -0.27           | 0.79    |
| 1921 - 1960 | 0.36       | 0.72    | -0.20           | 0.84    |

---

|             |       |      |       |      |
|-------------|-------|------|-------|------|
| 1922 - 1961 | 0.41  | 0.68 | -0.34 | 0.74 |
| 1923 - 1962 | 0.03  | 0.97 | -0.80 | 0.42 |
| 1924 - 1963 | -0.43 | 0.67 | -1.25 | 0.21 |
| 1925 - 1964 | -0.55 | 0.58 | -1.20 | 0.23 |
| 1926 - 1965 | -0.57 | 0.57 | -1.06 | 0.29 |
| 1927 - 1966 | -0.45 | 0.65 | -0.97 | 0.33 |
| 1928 - 1967 | -0.38 | 0.70 | -0.76 | 0.45 |
| 1929 - 1968 | 0.43  | 0.67 | 0.03  | 0.97 |
| 1930 - 1969 | 0.24  | 0.81 | 0.45  | 0.65 |
| 1931 - 1970 | 0.29  | 0.77 | 0.00  | 1.00 |
| 1932 - 1971 | 0.08  | 0.93 | -0.16 | 0.87 |
| 1933 - 1972 | -0.06 | 0.95 | -0.42 | 0.67 |
| 1934 - 1973 | 0.13  | 0.90 | -0.47 | 0.64 |
| 1935 - 1974 | -0.03 | 0.97 | -0.47 | 0.64 |
| 1936 - 1975 | 0.00  | 1.00 | -0.37 | 0.71 |
| 1937 - 1976 | -0.01 | 0.99 | -0.23 | 0.82 |
| 1938 - 1977 | 0.34  | 0.74 | 0.01  | 0.99 |
| 1939 - 1978 | 0.03  | 0.97 | -0.43 | 0.67 |
| 1940 - 1979 | 0.20  | 0.84 | 0.06  | 0.95 |
| 1941 - 1980 | 0.80  | 0.42 | 0.06  | 0.95 |
| 1942 - 1981 | 0.85  | 0.40 | -0.01 | 0.99 |
| 1943 - 1982 | 0.57  | 0.57 | -0.12 | 0.91 |
| 1944 - 1983 | 1.11  | 0.27 | -0.16 | 0.87 |
| 1945 - 1984 | 0.43  | 0.67 | -0.70 | 0.48 |
| 1946 - 1985 | -0.13 | 0.90 | -0.77 | 0.44 |
| 1947 - 1986 | -0.13 | 0.90 | -0.54 | 0.59 |
| 1948 - 1987 | 0.13  | 0.90 | -0.26 | 0.80 |
| 1949 - 1988 | 0.10  | 0.92 | -0.26 | 0.80 |
| 1950 - 1989 | -0.45 | 0.65 | -0.54 | 0.59 |
| 1951 - 1990 | -0.08 | 0.93 | -0.23 | 0.82 |
| 1952 - 1991 | -0.24 | 0.81 | -0.47 | 0.64 |
| 1953 - 1992 | -0.41 | 0.68 | -0.49 | 0.62 |
| 1954 - 1993 | -0.45 | 0.65 | -0.91 | 0.36 |
| 1955 - 1994 | -0.52 | 0.60 | -0.16 | 0.87 |
| 1956 - 1995 | 0.08  | 0.93 | 0.12  | 0.91 |
| 1957 - 1996 | -0.17 | 0.86 | -0.41 | 0.68 |
| 1958 - 1997 | -0.64 | 0.52 | -1.01 | 0.31 |
| 1959 - 1998 | -0.87 | 0.38 | -1.48 | 0.14 |
| 1960 - 1999 | -0.62 | 0.54 | -1.18 | 0.24 |
| 1961 - 2000 | -0.71 | 0.48 | -0.36 | 0.72 |
| 1962 - 2001 | 0.08  | 0.93 | 0.28  | 0.78 |
| 1963 - 2002 | 0.29  | 0.77 | 0.63  | 0.53 |
| 1964 - 2003 | 0.45  | 0.65 | 1.13  | 0.26 |
| 1965 - 2004 | 0.31  | 0.75 | 0.91  | 0.36 |

---

---

|             |       |      |       |      |
|-------------|-------|------|-------|------|
| 1966 - 2005 | -0.55 | 0.58 | 0.19  | 0.85 |
| 1967 - 2006 | -0.99 | 0.32 | -0.10 | 0.92 |
| 1968 - 2007 | -0.94 | 0.35 | -0.10 | 0.92 |
| 1969 - 2008 | -0.24 | 0.81 | 0.59  | 0.55 |
| 1970 - 2009 | 0.15  | 0.88 | 0.94  | 0.35 |
| 1971 - 2010 | -0.13 | 0.90 | 0.55  | 0.58 |
| 1972 - 2011 | -0.08 | 0.93 | 0.59  | 0.55 |
| 1973 - 2012 | -0.29 | 0.77 | 1.04  | 0.30 |
| 1974 - 2013 | -0.20 | 0.84 | 0.90  | 0.37 |
| 1975 - 2014 | 0.48  | 0.63 | 1.81  | 0.07 |
| 1976 - 2015 | 0.66  | 0.51 | 1.60  | 0.11 |
| 1977 - 2016 | 0.13  | 0.90 | 1.20  | 0.23 |
| 1978 - 2017 | -0.13 | 0.90 | 0.76  | 0.45 |
| 1979 - 2018 | -0.13 | 0.90 | 0.62  | 0.54 |
| 1980 - 2019 | -0.45 | 0.65 | 0.36  | 0.72 |

---
